# Supplementary material for: MiR-202-5p is a novel germ plasm-specific microRNA in zebrafish
Source: PubMed Central journal article supplement (PMC5539161; doi:10.1038/s41598-017-07675-x), 2017-08-01

# **MiR-202-5p is a novel germ plasm-specific microRNA in zebrafish**

Jing Zhang<sup>1</sup>, Wei Liu<sup>1</sup>, Yilin Jin, Peng Jia, Kuntong Jia\* & Meisheng Yi\*

Guangdong Provincial Key Laboratory of Marine Resources and Coastal Engineering, Zhuhai Key Laboratory of Marine Bioresources and Environment, School of Marine Sciences, Sun Yat-sen University, Guangdong, China.

<sup>1</sup> These authors contributed equally to this work.

\*Correspondence and requests for materials should be addressed to M. Y. (yimsh@mail.sysu.edu.cn) or K. J. (jiakt3@mail.sysu.edu.cn)

**Supplementary Information: Table S1 and Figure S1**

### Supplementary Table S1. Primer sequences

| Name          | Sequence (5'-3')                           |
|---------------|--------------------------------------------|
| miR-202-5p    | TTCCATGCATATACCTCTTTG                      |
| miR-202-3p    | AGAGGCATAGGGCATGGAAAA                      |
| <i>vasa</i> F | AGATCTCAACCACAAGCATCCA                     |
| <i>vasa</i> R | <u>TAATACGACTCACTATA</u> TGTTACAGTCAGTCACT |

The T7 core promoter sequence in *vasa* reverse (*vasa* R) primer was underlined

**Supplementary Figure S1.** Embryonic expression patterns of miR-202-3p. WISH detection of miR-202-3p expression in embryos at different developmental stages (A) 1-cell stage; (B) 4-cell stage; (C) dome stage; (D) 3-somite and (E) prim-5 stage.

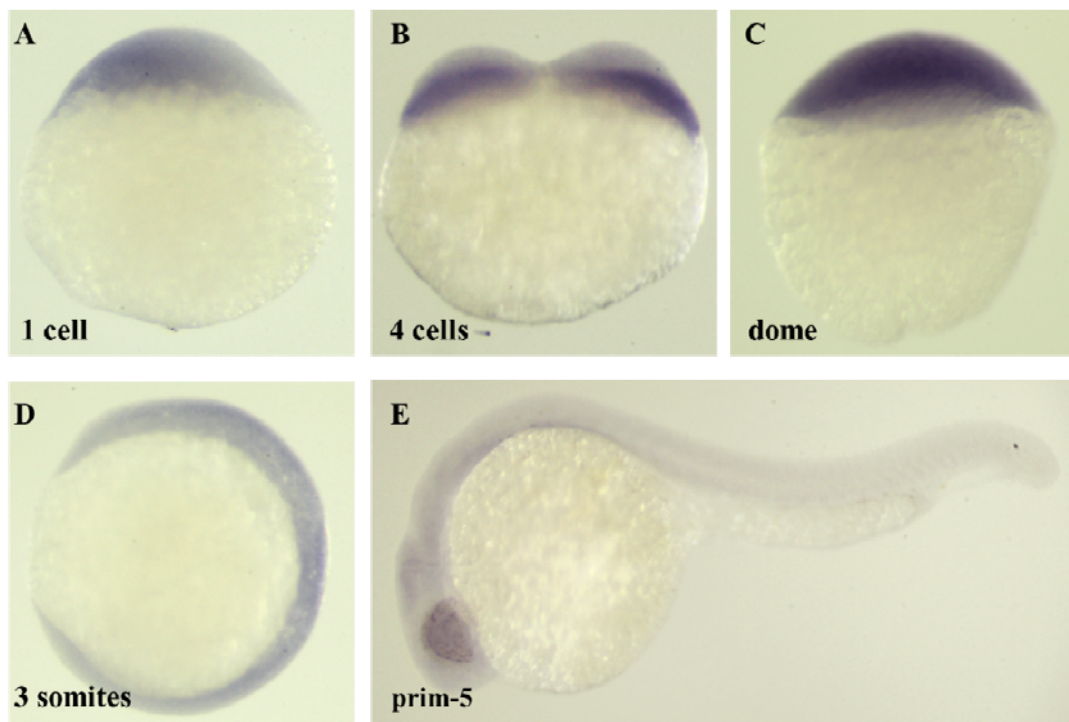

Supplement: 41598_2017_7675_MOESM1_ESM.pdf [file 41598_2017_7675_MOESM1_ESM.pdf]
